# Supplementary material for: Association of Chronic Toxoplasma gondii Infection with Pro-Inflamatory Cytokine Interleukin (IL)-12 Responses in Type-2 Diabetes Mellitus Patients of Bangladesh
Source: Hindawi journal article supplement (doi:10.1155/2023/3885160), 2023-05-08
Supplement: f1 [file 3885160.f1.pdf]

**Supplementary Table 1: Comparison of the complete blood count test data between different groups**

| <b>Blood parameter</b>          | <b>Type-2 DM<br/>(N= 100)</b> |           | <b>Healthy Control<br/>(N=100)</b> |           | <b>p-value</b> |
|---------------------------------|-------------------------------|-----------|------------------------------------|-----------|----------------|
|                                 | <b>Mean</b>                   | <b>SD</b> | <b>Mean</b>                        | <b>SD</b> |                |
| <b>Hemoglobin (g/dL)</b>        | 13.24                         | 1.589     | 11.61                              | 1.679     | <0.0001        |
| <b>ESR (mm/h)</b>               | 38.78                         | 26.54     | 35.40                              | 24.53     | 0.4858         |
| <b>Total WBC (cumm)</b>         | 8347                          | 2046      | 9833                               | 2621      | 0.0015         |
| <b>Total RBC (million/cumm)</b> | 5.071                         | 0.667     | 4.763                              | 0.882     | 0.0886         |
| <b>Total Platelet (cumm)</b>    | 310960                        | 90474     | 277679                             | 66076     | 0.0359         |
| <b>Cir. Eosinophils (cumm)</b>  | 264.9                         | 252.0     | 308.1                              | 129.9     | 0.0026         |
| <b>Neutrophils (%)</b>          | 63.86                         | 9.108     | 68.65                              | 12.01     | 0.0128         |
| <b>Lymphocytes (%)</b>          | 29.50                         | 8.320     | 25.29                              | 11.45     | 0.0204         |
| <b>Monocytes (%)</b>            | 3.380                         | 1.462     | 2.809                              | 1.109     | 0.0067         |
| <b>Eosinophils (%)</b>          | 3.220                         | 2.773     | 3.353                              | 1.647     | 0.0444         |
| <b>Basophils (%)</b>            | 0.040                         | 0.1969    | 0.0196                             | 0.140     | 0.6630         |
| <b>MCV (fL)</b>                 | 78.43                         | 7.767     | 79.78                              | 9.901     | 0.1146         |
| <b>RDW-SD (fL)</b>              | 38.00                         | 3.775     | 38.82                              | 6.877     | 0.0214         |
| <b>HCT (%)</b>                  | 39.53                         | 4.751     | 36.86                              | 5.680     | 0.0012         |
| <b>MPV (fL)</b>                 | 10.72                         | 2.521     | 9.400                              | 1.757     | <0.0001        |
| <b>PDW (fL)</b>                 | 13.09                         | 3.921     | 14.78                              | 2.498     | <0.0001        |
