# Supplementary material for: Association of Chronic Toxoplasma gondii Infection with Pro-Inflamatory Cytokine Interleukin (IL)-12 Responses in Type-2 Diabetes Mellitus Patients of Bangladesh
Source: Hindawi journal article supplement (doi:10.1155/2023/3885160), 2023-05-08

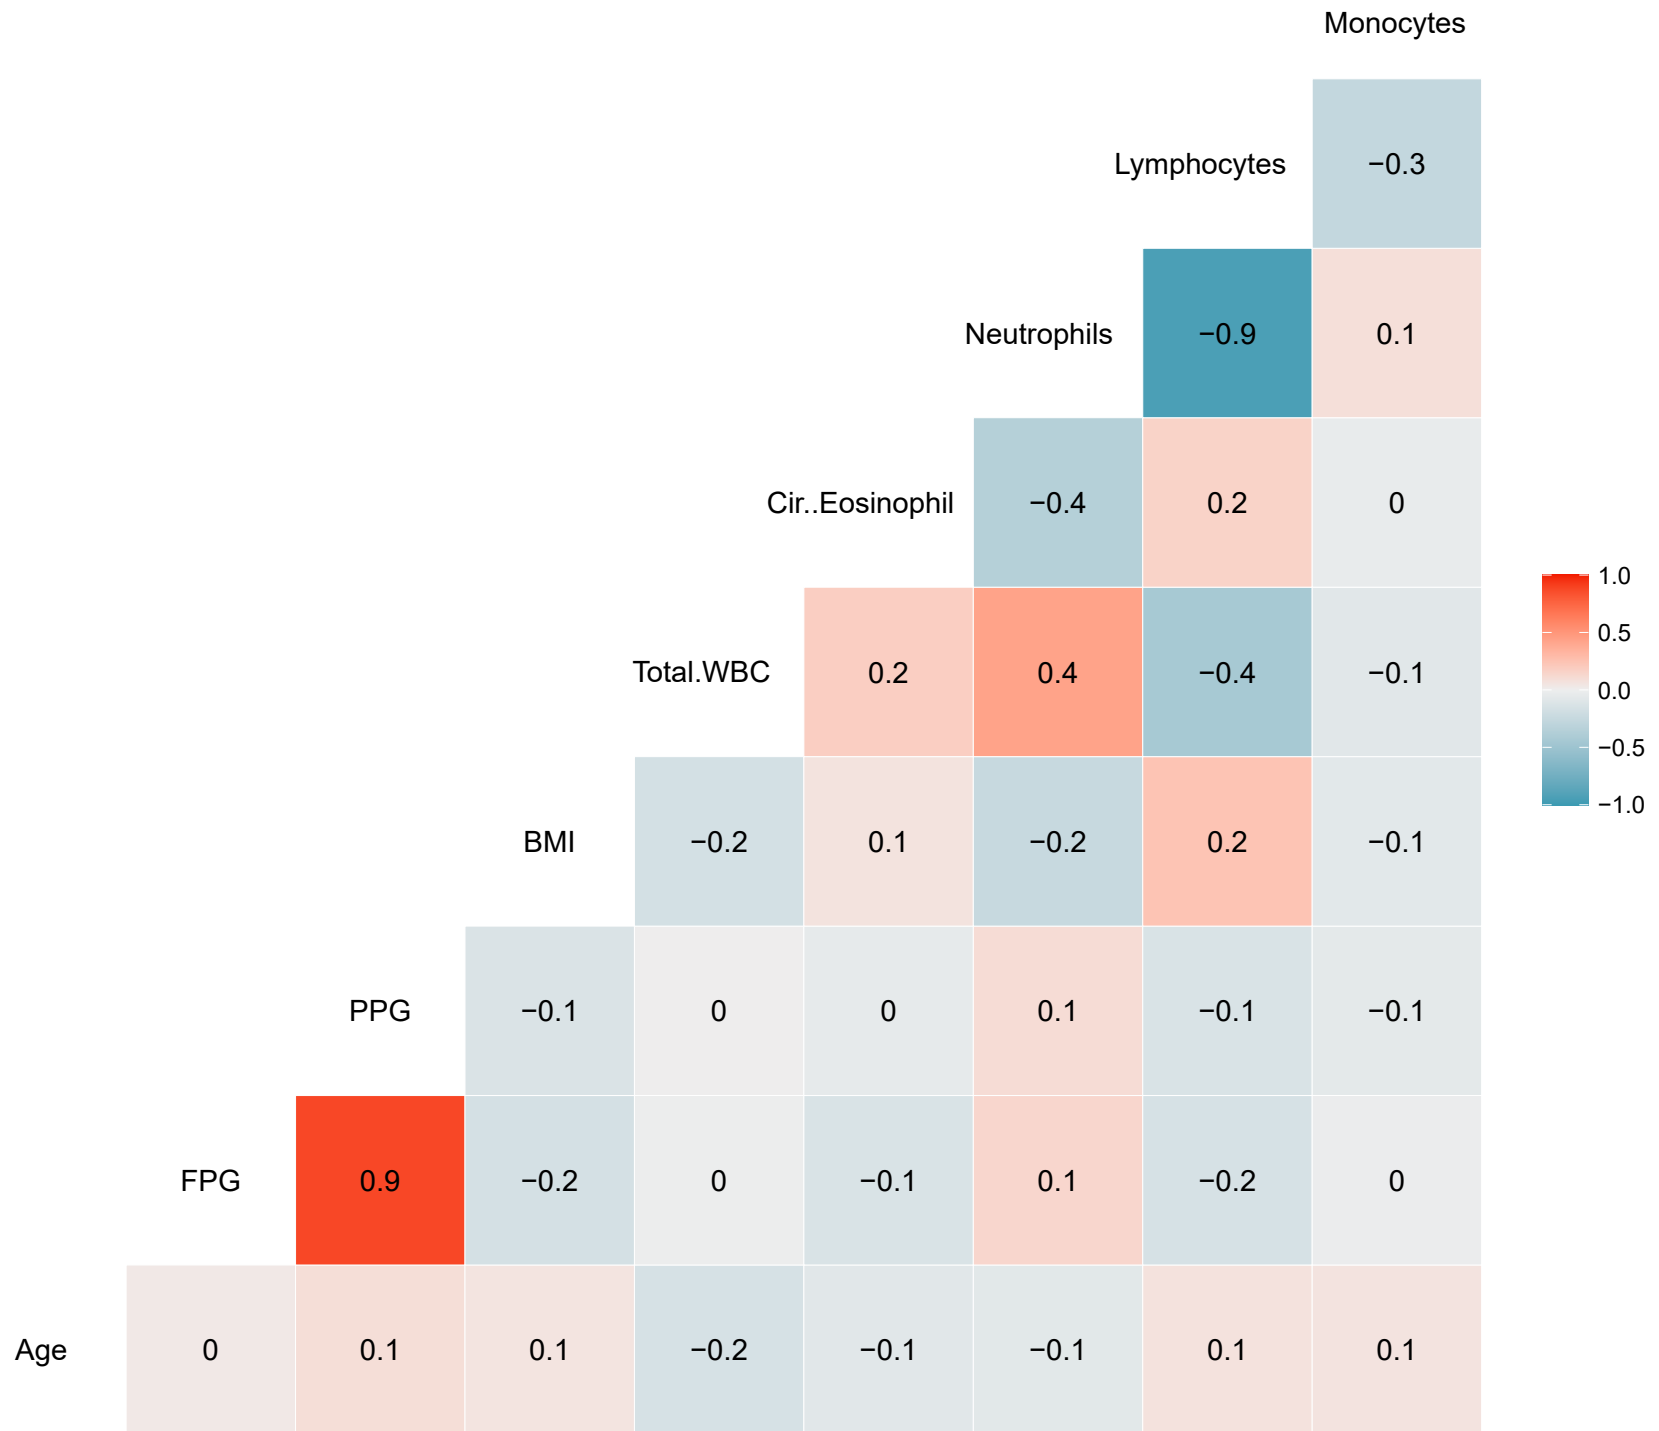

Supplement: f2 [file 3885160.f2.pdf]
